# Supplementary material
Source: PubMed Central journal article supplement (PMC5270581)
Supplement: NIHMS837581-supplement.pdf [file NIHMS837581-supplement.pdf]

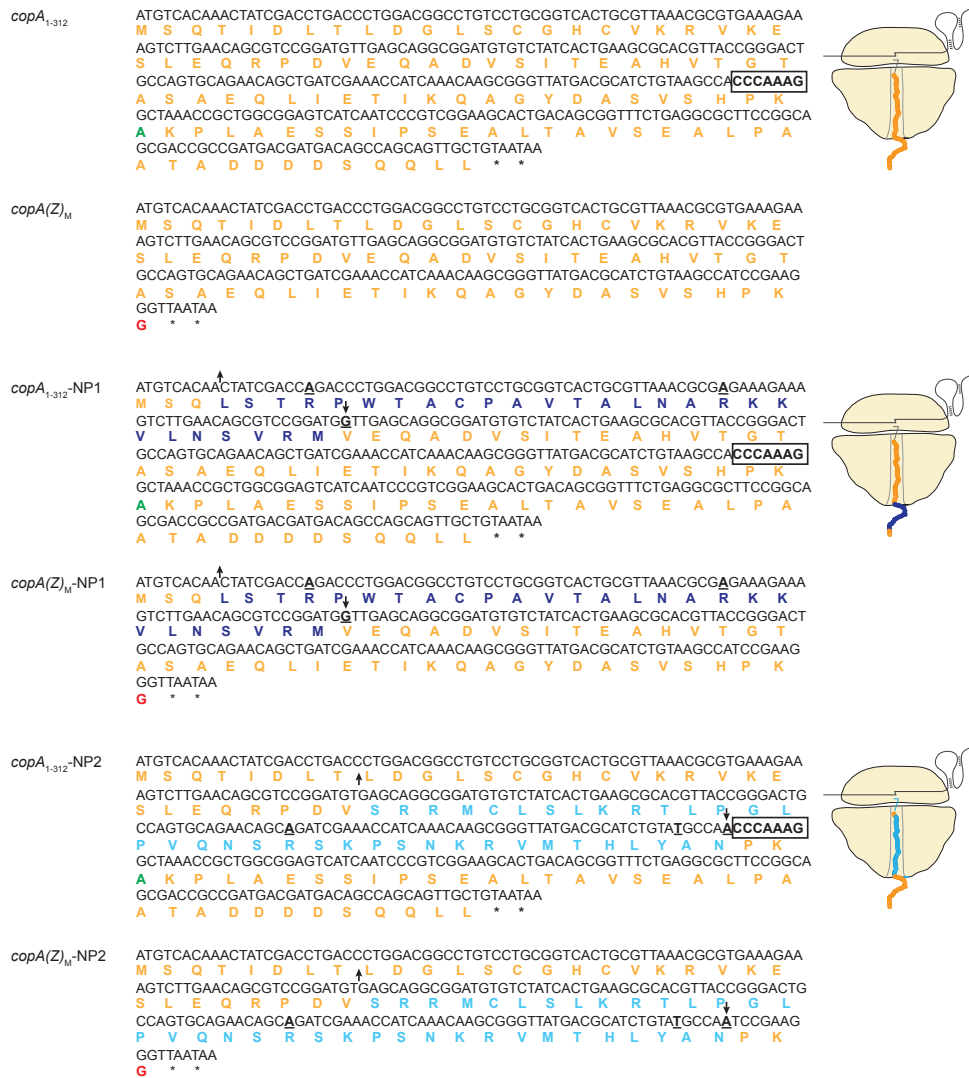

**Figure S1. Generation of mutant nascent peptide templates, Related to Figure 4.**

The nucleotide sequences of the DNA templates used for in vitro translation and the amino acid sequences of the proteins encoded in 0 frame. The *copA*<sub>1-312</sub> template carries the wt *copA* sequence except for insertion of two stop codons (UAA) after codon 104. The wt amino acid sequence (residues in orange) was changed in the *copA*<sub>1-312</sub>-NP1 (amino acids shown in dark blue) and *copA*<sub>1-312</sub>-NP2 (residues in light blue) templates by introducing compensatory indel mutations (indicated by the arrows). Additional mutations introduced to avoid the appearance of premature stop codons in the mutant constructs are indicated with bold and underlined characters. Notice that none of the changes in the templates disrupted the integrity of the CCCAAAG slippery sequence (boxed). The cartoons, which represent ribosomes positioned at the *copA* slippery sequence, illustrate the portion of the CopA nascent chain that has been altered. Also shown are the sequences of the marker templates *copA*(Z)<sub>M</sub>, *copA*(Z)<sub>M</sub>-NP1, and *copA*(Z)<sub>M</sub>-NP2, in which the relevant CopA(Z) polypeptides, used as markers for the gel electrophoresis, are encoded in the 0 frame.

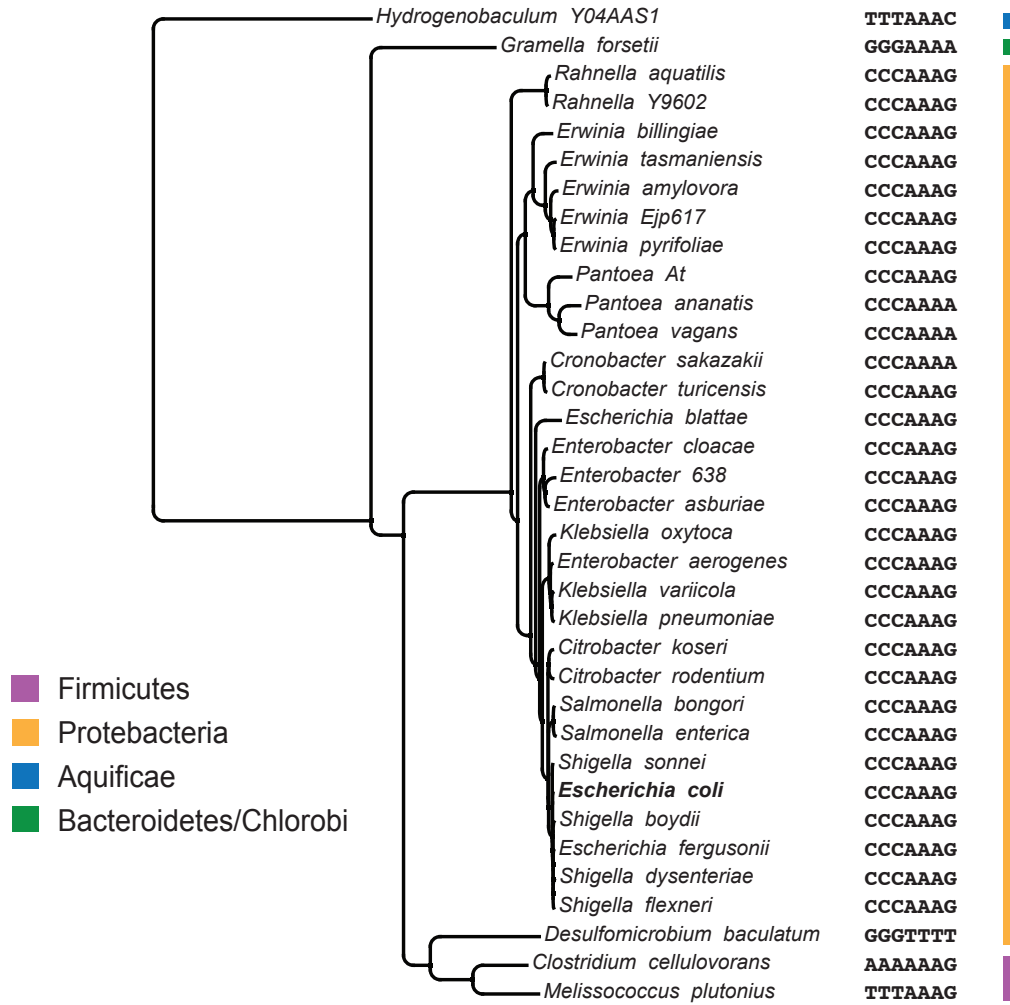

**Figure S2. The presence of the slippery sequence at the end of the MBD1-coding segment in the *copA* gene of a variety of bacterial species, Related to Figure 2**

Phylogenetic tree of bacterial species whose *copA* genes contain an SS heptamer followed by a nearby -1 frame stop codon. The colored vertical bars indicate the phylum of each bacterial species. The criteria applied for the selection of the species included in the tree is described in STAR methods.

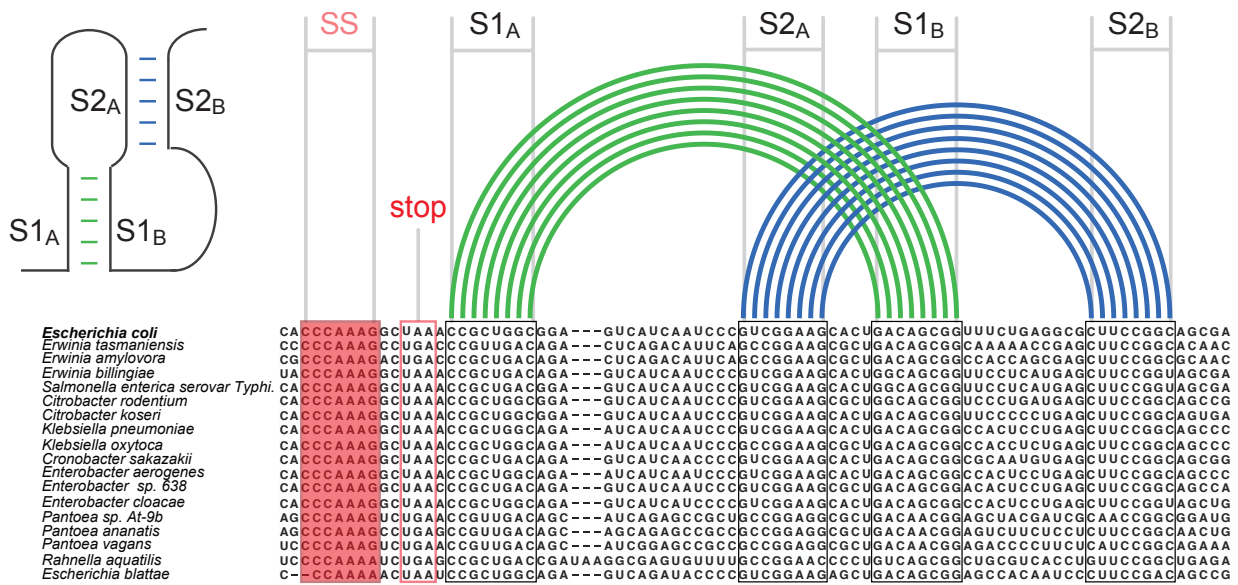

**Figure S3. Conservation of the predicted mRNA pseudoknot that facilitates -1 PRF in the *copA* gene among different bacterial species, Related to Figure 3**

The stems S1 and S2 of the predicted pseudoknot downstream from the slippery sequence (boxed) in the *copA* gene of different bacteria are indicated by green and blue arches, respectively. Note that the covariation of residues within the S1 and S2 sequences is consistent with the folding of mRNA into the pseudoknot structure.

|                                 |                                                              |
|---------------------------------|--------------------------------------------------------------|
| <i>Cavia porcellus</i>          | GCTAACCCAAAGAGAACATCGGCTTTTGCTAACCCAGAATTTCAATAACTCTGAGACC   |
| <i>Otospermophilus beecheyi</i> | ATTAACCCAAAGAGACTGTCGGCTTCAGCTAAATCAGAATTTCAATAAATTCTGAGACC  |
| <i>Tupaia chinensis</i>         | ACTAACCCAAAGAGACTTTTCGGCTTCTGCAAACCAGAATTTCAATAAATTCTGAGACC  |
| <i>Otolemur crassicaudatus</i>  | ACTAACCCAAAGAGCCTTTCAGCTTTTGCTAACCCAGAATTTCAATAAATTCTGAGACC  |
| <i>Callithrix jacchus</i>       | ACTTAACCCAAAGAGACTTTTCACTTCTGCTAACCCAGAATATTAATAAATTCTGAGACC |
| <i>Chlorocebus sabaeus</i>      | ACTAACCCAAAGAGACCTTTTATCTTCTGCTAACCCAGAATTTTAATAAATTCTGAGACC |
| <i>Papio anubis</i>             | ACTAACCCAAAGAGACCTTTTATCTTCTGCTAACCCAGAATTTTAATAAATTCTGAGACC |
| <i>Macaca mulatta</i>           | ACTAACCCAAAGAGACCTTTTATCTTCTGCTAACCCAGAATTTTAATAAATTCTGAGACC |
| <i>Pongo pygmaeus</i>           | ACTAACCCAAAGAGACCTTTTATCTTCTGCTAACCCAGAATTTTAATAAATTCTGAGACC |
| <i>Nomascus leucogenys</i>      | ACTAACCCAAAGAGACCTTTTATCTTCTGCTAACCCAGAATTTTAATAAATTCTGAGACC |
| <i>Pan paniscus</i>             | ACTAACCCAAAGAGACCTTTTATCTTCTGCTAACCCAGAATTTTAATAAATTCTGAGACC |
| <i>Gorilla gorilla</i>          | ACTAACCCAAAGAGACCTTTTATCTTCTGCTAACCCAGAATTTTAATAAATTCTGAGACC |
| <i>Homo sapiens</i>             | ACTAACCCAAAGAGACCTTTTATCTTCTGCTAACCCAGAATTTTAATAAATTCTGAGACC |
| <i>Equus caballus</i>           | ACTAACCCAAAGACACCTTCAGCTTCTGCTAACCCAGAATTTCAATAAACTCTGAGACC  |
| <i>Felis catus</i>              | ACCAACCCAAAGACCCCTTTGACGTCTGGTACCCAGAATCTCAATAAACTCTGAGACC   |
| <i>Canis lupus</i>              | ACCAACCCAAAGATGCCTTTGACTTCTGATAAACCCAGAATCTCAATAAACTCTGAGACC |
| <i>Mustela putorius furo</i>    | ACCAATCCAAAGACCCCTTTGGCATCTGATAAACCCAGTCTCTCAATAAACTCTGAGACC |
| <i>Ailuropoda melanoleuca</i>   | ACCAACCCAAAGACACCTTTGGCTTCTGATAAACCCAGAATCTCAATAAACTCTGAGACC |
| <i>Tursiops truncatus</i>       | AGCCACCCAAAGGCCCTCAGGCTTCCATTAACCCAGAATGGCAATAAACTCAGAGACC   |

**Figure S4. Slippery sequence is found in in the *ATP7B* gene homologs of several eukaryotic species, Related to Figure 6**

Sequence alignment of the *ATP7B* gene sequences in the vicinity of the slippery sequence (shaded red). The downstream stop codons in the -1 frame are boxed.

**Table S1: Oligonucleotides used in this study, Related to the STAR Methods**

|    | <b>Sequence (5' to 3')</b>                                                             | <b>Purpose</b>                                                                    |
|----|----------------------------------------------------------------------------------------|-----------------------------------------------------------------------------------|
| 1  | ACGCATCTGTAAGCCATCCTAAGGCTAAACCGCTGG                                                   | Site directed mutagenesis for generation of <i>pcopA</i> -mSS                     |
| 2  | TTATTAACCCTTCGGATGGCTTACAGATGCGTCATAAC                                                 | Reverse primer for <i>CopA(Z)<sub>M</sub></i> -NP1 and <i>CopA(Z)<sub>M</sub></i> |
| 3  | TTATTAACCCTTCGGATTGGCATAACAGATGCGTCA                                                   | Reverse primer for <i>CopA(Z)<sub>M</sub></i> -NP2                                |
| 4  | CATGGATTCTTGACAATTAATCATCGGCTCGTATAATGTGTGGACTTAA<br>GTATAAGGAGGAAAAAATATGTCACAA       | Forward primer for <i>CopA(Z)<sub>M</sub></i> -NP1                                |
| 5  | CATGGATTCTTGACAATTAATCATCGGCTCGTATAATGTGTGGACTTAA<br>GTATAAGGAGGAAAAAATATGTCACAAACTATC | Forward primer for all templates used in vitro                                    |
| 6  | TTA TTA CAG CAA CTG CTG GCT G                                                          | Reverse primer for <i>copA</i> <sub>1-312</sub>                                   |
| 7  | TTA TTA GGT CGC TGC CGG                                                                | Reverse primer for <i>copA</i> <sub>1-282</sub>                                   |
| 8  | TTA TTA AGA AAC CGC TGT CAG TG                                                         | Reverse primer for <i>copA</i> <sub>1-261</sub>                                   |
| 9  | TTA TTA TTC CGA CGG GAT TGA TGA                                                        | Reverse primer for <i>copA</i> <sub>1-243</sub>                                   |
| 10 | TTA TTA CGC CAG CGG TTT AGC                                                            | Reverse primer for <i>copA</i> <sub>1-222</sub>                                   |
| 11 | TCACAAACTATCGACCTGACC                                                                  | Forward primer for Fragment-1                                                     |
| 12 | GGCGCGTCCCATTTCGCCATTCTCCGGTCGACTCTAGAGGATCCCACG<br>AAACAGCACACTG                      | Reverse primer for Fragment-1                                                     |
| 13 | ATGTCTATTGCTGGTTTATTCGGTACCCGGGGATCGCGGCCGCTATCC<br>GGCGGAGTACAG                       | Forward primer for Fragment-2                                                     |
| 14 | TTACAGATGCGTCATAACCCG                                                                  | Reverse primer for Fragment-2                                                     |
| 15 | TTGAGCGAGTTCTCAAAAATGAACAAATGTCGACGTACAAACTATCGA<br>CCTGACC                            | Forward primer for DLR1 and DLR1-NP2                                              |
| 16 | GATGCGTCATAACCCGCTTG                                                                   | Reverse primer for DLR1 and DLR1-NP2                                              |
| 17 | ACCATCAAACAAGCGGGTTATGACGCATCTGTAAGCCACCCAAAGGCA<br>AACCGCTGGCGG                       | Forward primer for DLR2                                                           |
| 18 | GCTTCCGACGGGATTGATGACTCCGCCAGCGGTTTGCCTTTGGGTGG<br>CTTACAGATGCG                        | Reverse primer for DLR2                                                           |
| 19 | GCTGGCGGAGTCATCAATC                                                                    | Forward primer for DLR3                                                           |
| 20 | CCTTTCTTTATGTTTTTGGCGTCTTCCATGAGCTCATCGTCATCGGCGG<br>TCG                               | Reverse primer for DLR3                                                           |
| 21 | ACCATCAAACAAGCGGGTTATGACGCATCTGTAAGCCATCCTAAGGCA<br>AACCGCTGGCGG                       | Forward primer for DLR2-mSS                                                       |
| 22 | GCTTCCGACGGGATTGATGACTCCGCCAGCGGTTTGCCTTAGGATGG<br>CTTACAGATGCG                        | Reverse primer for DLR2-mSS                                                       |
| 23 | CCATCAAACAAGCGGGTTATGACGCATCTGTATGCCAACCCAAAGGCA<br>AACCGCTGGCGG                       | Forward primer for DLR2-NP2                                                       |
| 24 | GCTTCCGACGGGATTGATGACTCCGCCAGCGGTTTGCCTTTGGGTG<br>GCATACAGATGCG                        | Reverse primer for DLR2-NP2                                                       |
| 25 | AATGTGACGTCACAAACTATCGACCTGACC                                                         | Forward primer for DLR-C                                                          |
| 26 | CATGAGCTCATCGTCATCGGCGGTC                                                              | Reverse primer for DLR-C                                                          |
| 27 | CATCAAACAAGCGGGTTATGACGCATCTGTATGCCAATCCTAAGGCTA<br>AACCGCTGGCGG                       | Forward primer for DLR2-NP2-C                                                     |
| 28 | CTTCCGACGGGATTGATGACTCCGCCAGCGGTTAGCCTTAGGATTGG<br>CATACAGATGCG                        | Reverse primer for DLR2-NP2-C                                                     |
| 29 | CCTTTCTTTATGTTTTTGGCGTCTTCCATGAGCTCATCGTCATCGGCGG<br>TC                                | Reverse primer for DLR3-NP2-C                                                     |

|    |                                                                                                                                                                                                                                                                                                                                                                                                                                   |                                                              |
|----|-----------------------------------------------------------------------------------------------------------------------------------------------------------------------------------------------------------------------------------------------------------------------------------------------------------------------------------------------------------------------------------------------------------------------------------|--------------------------------------------------------------|
| 30 | CATGGATTCTTGACAATTAATCATCGGCTCGTATAATGTGTGGACTTAA<br>GTATAAGGAGGAAAAAATATGTCACAACTATCGACCAGACCCTGGACG<br>GCCTGTCCTGCGGTCACTGCGTTAAACGCGAGAAAGAAAGTCTTGAAC<br>AGCGTCCGGATGGTTGAGCAGGCGGATGTGTCTATCACTGAAGCGCA<br>CGTTACCGGGACTGCCAGTGCAGAACAGCTGATCGAAACCATCAAACA<br>AGCGGGTTATGACGCATCTGTAAGCCACCCAAAGGCTAAACCGCTGG<br>CGGAGTCATCAATCCCCTCGGAAGCACTGACAGCGGTTTCTGAGGCG<br>CTTCCGGCAGCGACCGCCGATGACGATGACAGCCAGCAGTTGCTGTA<br>ATAA | <i>copA</i> -gBlock for<br><i>copA</i> <sub>1-312</sub> -NP1 |
| 31 | CATGGATTCTTGACAATTAATCATCGGCTCGTATAATGTGTGGACTTAA<br>GTATAAGGAGGAAAAAATATGTCACAACTATCGACCTGACCCTGGAC<br>GGCTGTCCTGCGGTCACTGCGTTAAACGCGTGAAAGAAAGTCTTGAAC<br>CAGCGTCCGGATGTGAGCAGGCGGATGTGTCTATCACTGAAGCGCAC<br>GTTACCGGGACTGCCAGTGCAGAACAGCAGATCGAAACCATCAAACAA<br>GCGGGTTATGACGCATCTGTATGCCAACCCAAAGGCTAAACCGCTGG<br>CGGAGTCATCAATCCCCTCGGAAGCACTGACAGCGGTTTCTGAGGCG<br>CTTCCGGCAGCGACCGCCGATGACGATGACAGCCAGCAGTTGCTGTA<br>ATAA  | <i>copA</i> -gBlock for<br><i>copA</i> <sub>1-312</sub> -NP2 |
| 32 | TTCGTTGAGCGAGTTCTCAAAAATGAACAAATGTCGACCCCAAAGGAC<br>CTTTATCTTCT<br>GCTAACCAGAATTTTAATAATTCTGAGACCTTGGGGCACCAAGGAAGC<br>CATGTGGTCACC<br>CTCCAAGTGAAGATAGATGGAATGCACGGATCCCCCGGGGAGCTCAT<br>GGAAGACGCC                                                                                                                                                                                                                              | <i>ATP7B</i> -WT gBlock                                      |
| 33 | TTCGTTGAGCGAGTTCTCAAAAATGAATAAATGTCGACCCCAAAGGAC<br>CTTTATCTTCT<br>GCTAACCAGAATTTTAATAATTCTGAGACCTTGGGGCACCAAGGAAGC<br>CATGTGGTCACC<br>CTCCAAGTGAAGATAGATGGAATGCACGGATCCCCCGGGGAGCTCAT<br>GGAAGACGCC                                                                                                                                                                                                                              | <i>ATP7B</i> -PTC Control gBlock                             |
| 34 | GTTGAGCGAGTTCTCAAAAATGAACAAATGTCGACCCCAAAGGACCTT<br>TATCTTCTGCTAACCAGAATTTTAATAATTCTGAGACCTTGGGGCACCA<br>AGGAAGCCATGTGGTCACCCTCCAAGTGAAGATAGATGGAATGCACG<br>GATCCCCCGGGGAGCTCATGGAAGACTAAGCCAAAAACATAAAGAAA<br>GGCCCGGCGCCATTCTATCCTCTAGAGGATGGAACCGCTGG                                                                                                                                                                          | <i>ATP7B</i> -OOF Control gBlock                             |
